# Supplementary material
Source: PubMed Central journal article supplement (PMC5515216)
Supplement: npjbiofilms201519-s1.pdf [file npjbiofilms201519-s1.pdf]

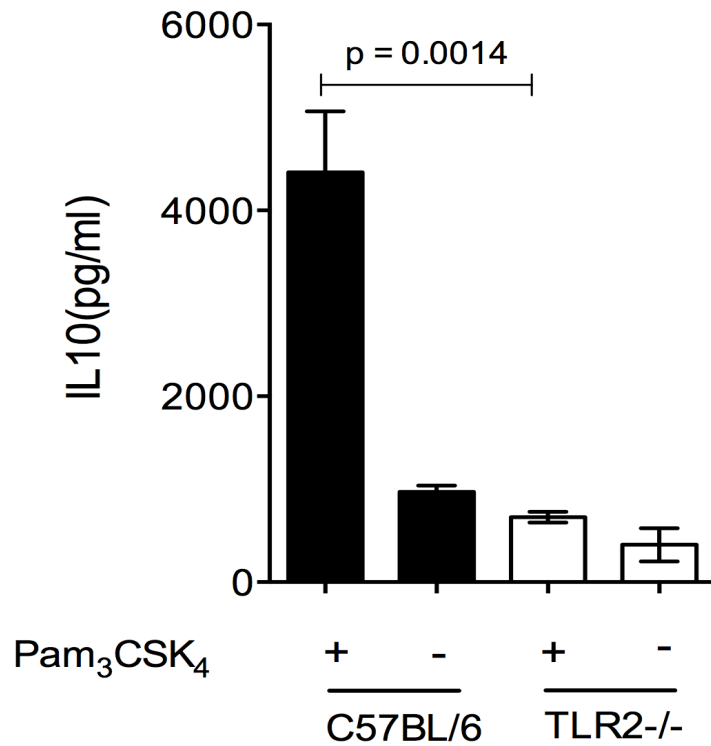

**Figure S1 – Synthetic TLR2/1 ligand induces IL10 production from bone marrow-derived macrophages.** Bone marrow-derived macrophages (BMDMs) from 6-8 week old female C57BL/6 and TLR2<sup>-/-</sup> mice were stimulated with 0.2 $\mu$ g/ml triacylated lipoprotein Pam3CSK4 for 24h. Supernatants were collected at this time point. Protein levels of IL-10 were measured in supernatants using ELISA.

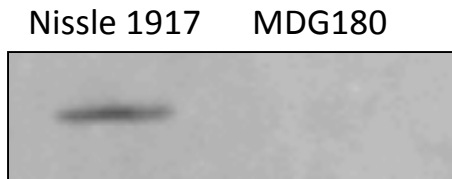

**Figure S2 – *E. coli* Nissle 1917 expresses curli fibers.** Western Blot analysis of curli production in Nissle 1917 and its  $\Delta$ csgA mutant, MDG180, using polyclonal anti-CsgA antibodies.

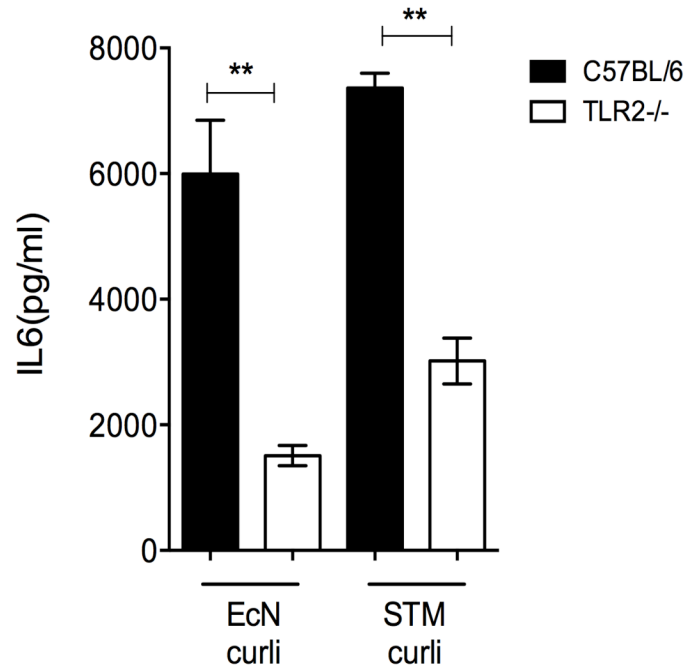

**Figure S3 - Curli fibers from commensal and pathogenic bacteria induce IL-6 from bone marrow-derived macrophages in a TLR2-dependent manner.** Incubation of 5 $\mu$ g/ml of curli extracted from a human commensal *E.coli* Nissle 1917 (EcN) or from *S. Typhimurium* elicited IL-6 to a similar extent from BMDMs in a TLR2-dependent manner.

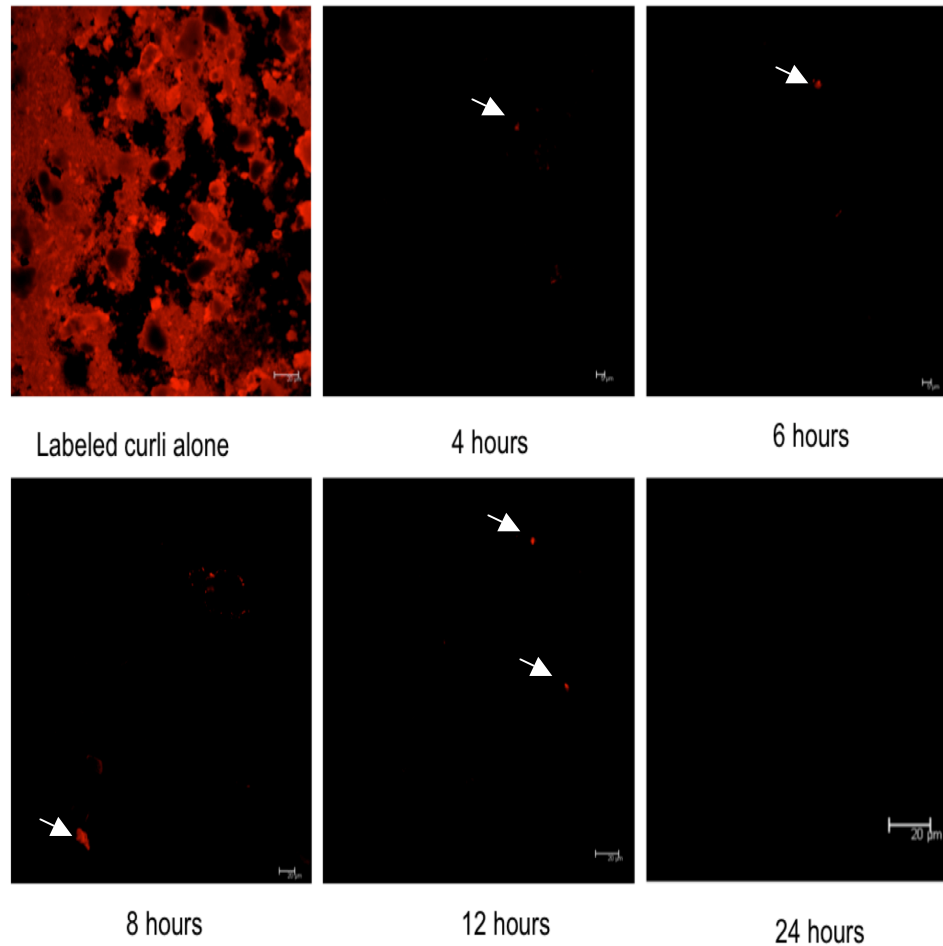

**Figure S4 – Curli fiber movement through GI tract**

Purified curli fibers from STM were labeled with the Dylight® 633. 8-week-old female Balb/c mice were then administered 0.1mg curli fibers via oral gavage. 2-3 fecal pellets were collected from each mice at the indicated time-points. The fecal pellets were resuspended in PBS and then imaged using Leica SP5 confocal microscope. Data is representative of two independent experiments.

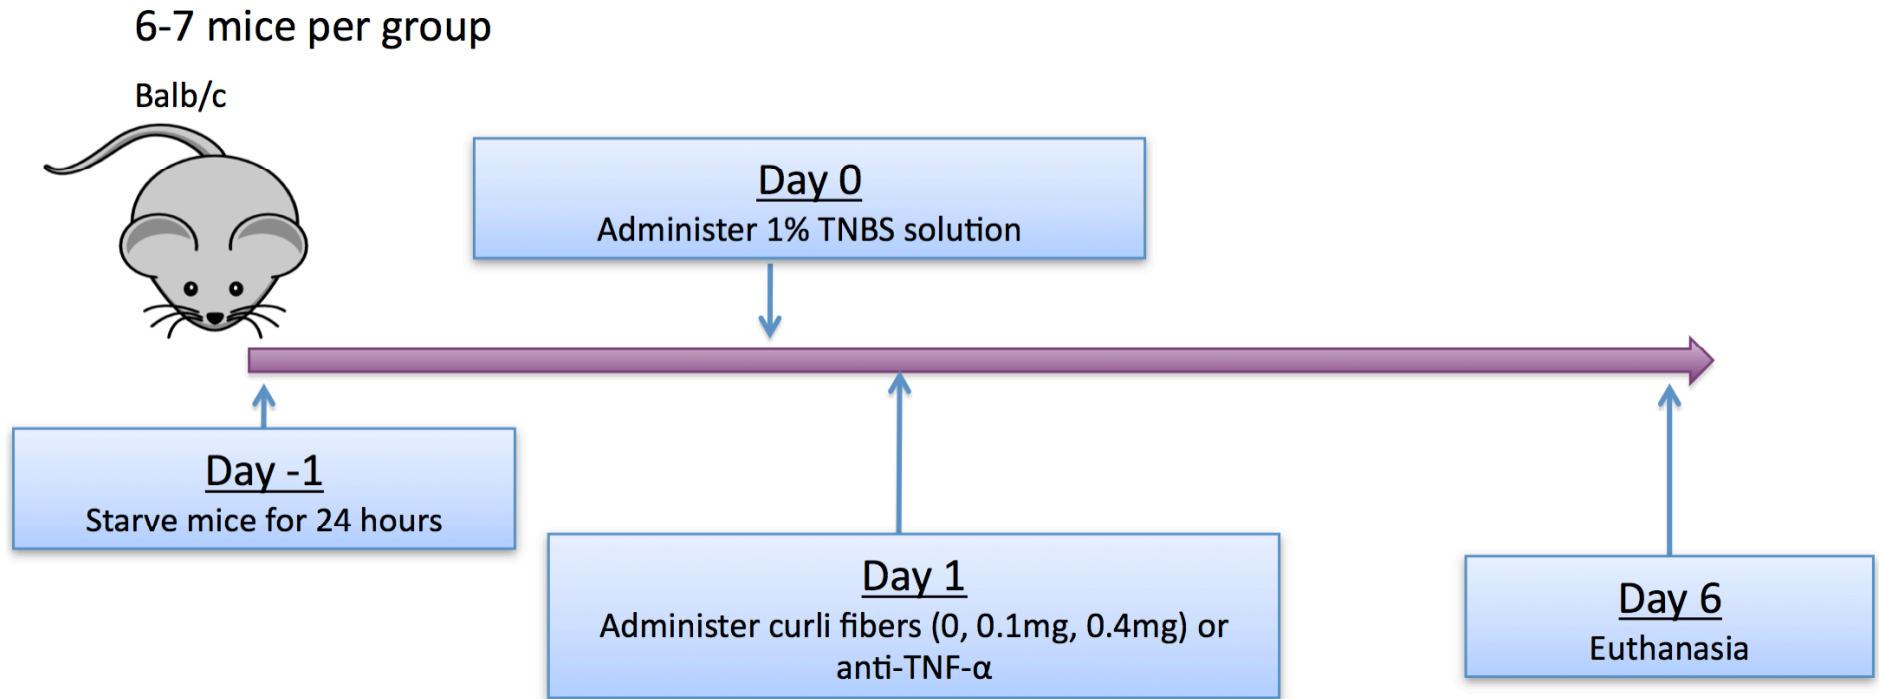

**Figure S5 – Experimental time course for TNBS colitis induction in 6-8 week old female Balb/c mice.** 6-8 week old female Balb/c mice were starved for 24 hours prior to administration of 1% TNBS intrarectally. One day after the TNBS enema, mice were treated with 0.1mg or 0.4mg curli fibers intragastrically or anti-TNF- $\alpha$  intraperitoneally. Mice were euthanized on day 6 following the administration of TNBS.

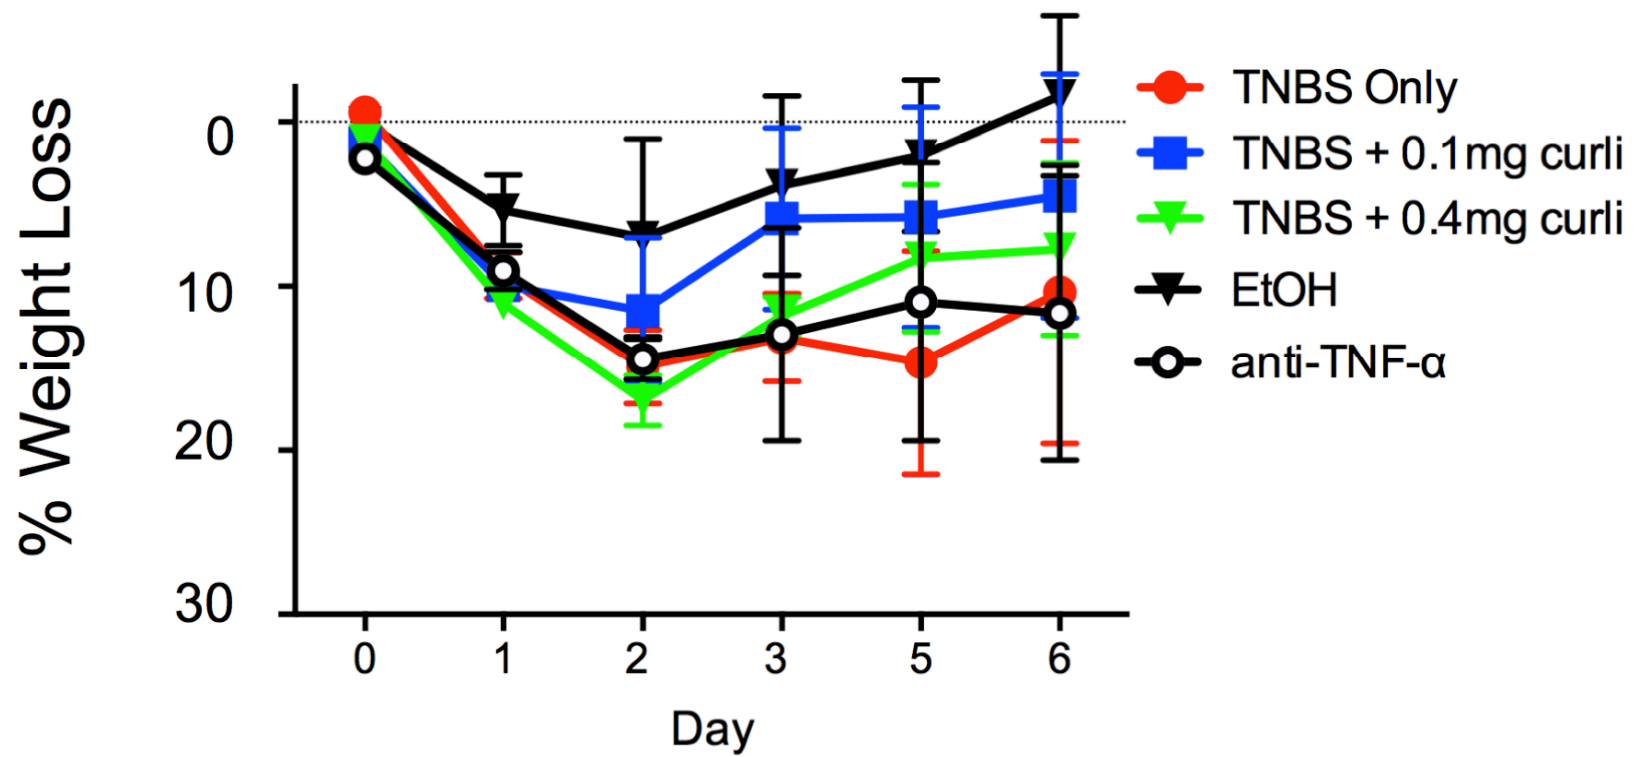

**Figure S6 – Effect of curli fibers on TNBS colitis-induced weight loss.** A single treatment of colitic mice with curli fibers rescued mice from TNBS colitis-induced weight loss.

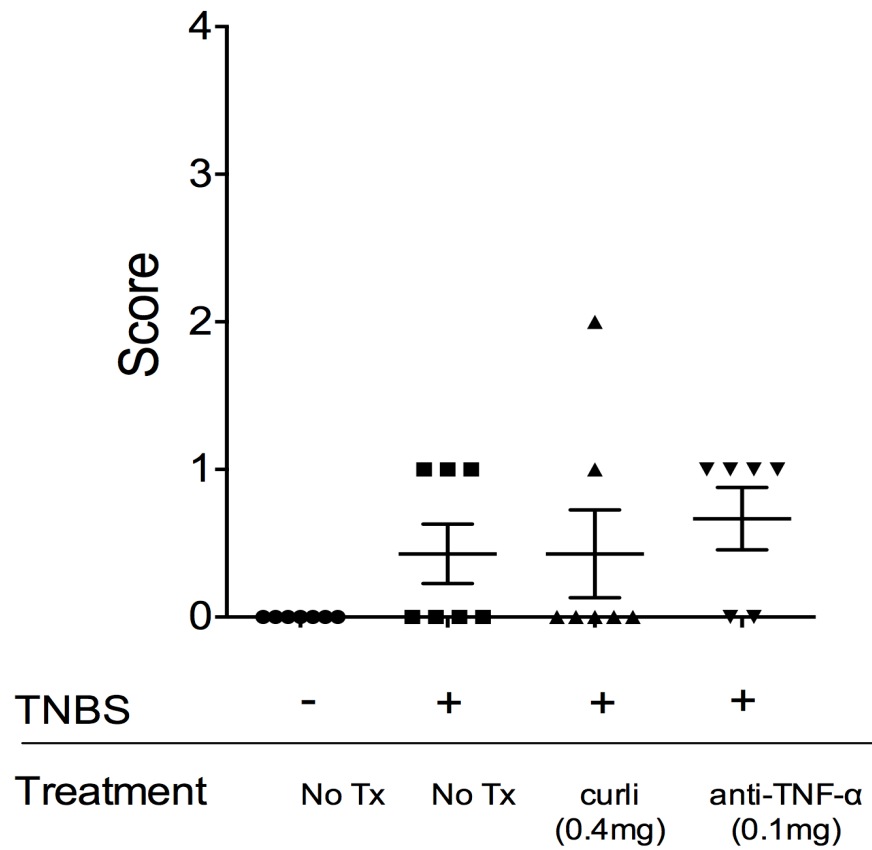

**Figure S7 – Stool consistency scores in colitic mice at day 6 post-TNBS colitis induction.** No significant differences were observed in stool consistency between mice in the different experimental groups at day 6 following induction of colitis.
